# Supplementary material for: Factors controlling the evaporation of secondary organic aerosol from α‐pinene ozonolysis
Source: PubMed Central journal article supplement — Geophys Res Lett. 2017 Mar 6;44(5):2562–70. doi: 10.1002/2016GL072364 (PMC5405578; doi:10.1002/2016gl072364), 2017-03-06
Supplement: GRL-44-2562-s001.pdf [file GRL-44-2562-s001.pdf]

1  
2  
3  
4  
5  
6  
7  
8  
9  
10  
11  
12  
13  
14  
15  
16  
17  
18  
19  
20  
21  
22  
23  
24  
25  
26  
27  
28  
29

*Geophysical Research Letters*

Supporting Information for

**Factors controlling the evaporation of secondary organic aerosol from  $\alpha$ -pinene ozonolysis**

Taina Yli-Juuti<sup>1</sup>, Aki Pajunoja<sup>1</sup>, Olli-Pekka Tikkanen<sup>1</sup>, Angela Buchholz<sup>1</sup>, Celia Faiola<sup>1</sup>, Olli Väisänen<sup>1</sup>, Liqing Hao<sup>1</sup>, Eetu Kari<sup>1</sup>, Otso Peräkylä<sup>2</sup>, Olga Garmash<sup>2</sup>, Manabu Shiraiwa<sup>3</sup>, Mikael Ehn<sup>2</sup>, Kari Lehtinen<sup>1</sup> and Annele Virtanen<sup>1</sup>

<sup>1</sup>Department of Applied Physics, University of Eastern Finland, P.O. Box 1627, 70211 Kuopio, Finland.

<sup>2</sup>Department of Physics, University of Helsinki, P.O. Box 64, 00014 Helsinki, Finland.

<sup>3</sup>Department of Chemistry, University of California Irvine, 92697-2025 Irvine, CA, USA.

<sup>4</sup>Finnish Meteorological Institute, P.O. Box 1627, 70211, Kuopio, Finland.

**Contents of this file**

Text S1  
Figures S1 to S4

**Additional Supporting Information (Files uploaded separately)**

Caption for Movie S1

**Introduction**

Supporting information includes additional explanation of the experimental system, description of the models, supplementary figures and a movie of a model simulation.

30 **Text S1.**

31

## 32 **1 Experimental methods**

33 Experiments were performed at the University of Eastern Finland (Kuopio) in the aerosol  
34 laboratory of the Department of Applied Physics. Both gas phase and particle phase were  
35 monitored with a comprehensive suite of instrumentation including a Scanning Mobility  
36 Particle Sizer (SMPS), Aerosol Mass Spectrometer (AMS) and 2 CPCs for monitoring the  
37 particle phase, and Proton Transfer Reaction Time of Flight Mass Spectrometer (PTR-ToF-MS),  
38 O<sub>3</sub>-monitor and RH-probes for monitoring the gas phase. The basic experimental setup is  
39 presented in Fig. S1.

40

### 41 **1.1 Glass flow tube – Particle generation**

42 SOA was generated via  $\alpha$ -pinene ozonolysis in a continuous flow reactor made of quartz  
43 (4.5 m length, 0.056 m diameter). The  $\alpha$ -pinene (Sigma-Aldrich, 98%) was introduced to the  
44 flow reactor by flowing 0.13 lpm of clean air through a diffusion source, which was constructed  
45 from a glass bottle with a vial of  $\alpha$ -pinene inside. VOC flow was controlled with a needle valve.  
46 Ozone was generated via photodissociation of oxygen in 0.6 lpm of clean air with a stable  
47 ozone generator (UVP, part # 97-0067-02). Dilution air was added at the inlet of the flow tube  
48 to adjust particle mass loadings and particle size. Dilution flow ranged from 1-6 lpm. A vacuum  
49 flow was also added upstream of the flow reactor to enable additional dilution of the  $\alpha$ -  
50 pinene/ozone mixture while maintaining the low flow rates through the flow reactor that were  
51 needed to grow the particles. Vacuum flows ranged from 0-3.5 lpm. Total flow through the flow  
52 reactor 2.5-3.33 lpm (average residence times in the flow tube ranged from 3.3-4.4 min). All  
53 flows were controlled with mass flow controllers unless otherwise noted. The polydisperse  
54 mass loadings in the flow reactor was 100-130  $\mu\text{g m}^{-3}$ . High polydisperse mass loadings had to  
55 be used to ensure there was enough monodisperse particle mass to conduct the evaporation  
56 experiments. Geometric mean diameter was  $51 \pm 2$  nm. SOA was generated under dry condition  
57 in all experiments except was one dry evaporation experiment (experiment 1) where particles  
58 were formed at 30% RH.

59

### 60 **1.2 DMA – Particle sampling and size selection**

61 The first Differential Mobility Analyzer (DMA<sub>1</sub>) selected a nearly monodisperse particle  
62 population from the generated SOA population. The selected particle size was 80 nm. A nano-  
63 DMA (TSI, model 3085) or a short Vienna style DMA (custom made) was used with open loop  
64 sheath flow configuration using sheath flow of 8.5 or 10 lpm and sample flow of 0.3 or 1.5 lpm,  
65 respectively, depending on the desired residence time. The total flow in DMA<sub>1</sub> leads to a  
66 drifting time of 0.2-0.3 s (nano-DMA) or 0.8-0.9 s (Vienna-DMA) inside DMA<sub>1</sub> [Li and Chen,  
67 2005]. The nano-DMA was used in dry experiment 1 and the short Vienna style DMA was used  
68 in all other experiments. Ozone was removed by passing the SOA through an ozone scrubber  
69 (copper tubing coated with dried KI solution) before entering DMA<sub>1</sub> to prevent oxidation  
70 reactions in the evaporation chamber. Purified air was used for the sheath air and therefore the  
71 gas phase of the sample at the exit from the DMA<sub>1</sub> can be assumed to be clean air. This was  
72 confirmed by PTR-ToF-MS and O<sub>3</sub>-monitor measurements. In case of 40% and 80% RH  
73 experiments the sheath air of DMA<sub>1</sub> was humidified with a Nafion humidifier. The RH was  
74 measured with Vaisala sensors (HMP 110) just before the inlet and after the outlet of the  
75 evaporation chamber. RH in the evaporation chamber was  $39 \pm 0.5\%$  (40% RH) and  $78 \pm 1\%$  (80%  
76 RH).

77  
78 **1.3 Evaporation chamber – Varying evaporation time**

79 After DMA<sub>1</sub> the nearly monodisperse particle population was fed into the evaporation  
80 chamber. The evaporation chamber is a 100 L (length 1.5 m) cylindrical stainless steel chamber  
81 with an inlet in the center of the upper end of the chamber and an outlet at center of the lower  
82 end. To prevent turbulence in the flow, laminar nets were installed at the top and bottom of the  
83 chamber. Particles were supplied continuously to the chamber until the desired concentration  
84 in the chamber was reached. After this the voltage in DMA<sub>1</sub> was set to zero to provide air with  
85 the same gas phase composition but without particles. This was necessary to replenish the  
86 sampled volume in the chamber. After filling, the instruments were disconnected and the  
87 chamber closed. Sampling was resumed for approx. 20 min at a time to collect data points for  
88 long residence times. Gas phase composition, particle size and composition were monitored  
89 during filling of the chamber providing data points with 20-30 min residence time. Shorter  
90 residence time data points (2.5-130 s) were achieved by increasing the tube length between the  
91 DMA<sub>1</sub> and SMPS (i.e. bypassing mode shown in the Fig. S1).  
92

93 **1.3.1 SMPS – Measuring the size of the evaporated particles**

94 Particle size distribution was measured with a Scanning Mobility Particle Sizer (SMPS, TSI  
95 model 3080 platform accompanied with CPC TSI model 3775 or 3772). The DMA<sub>1</sub> and SMPS  
96 systems were calibrated with ammonium sulfate (AS) particles at dry conditions before and  
97 after the campaign with multiple particle sizes. The TSI 3080 platform uses closed loop sheath  
98 flow configuration. The flow circulation unit consist of HEPA filters and an air circulation pump.  
99 For the filling of the evaporation chamber high sample flows were used in the SMPS to reduce  
100 filling time (3775 high flow mode, 1.5 lpm, or 3772, 1.0 lpm). The later sampling from the  
101 evaporation chamber was done with sample flows of 0.3 lpm (3775, low flow mode) or 1.0 lpm  
102 (3772). For short residence time measurements in bypassing mode, low flows were used in the  
103 SMPS. For the RH<sub>40%</sub> and RH<sub>80%</sub> experiments the SMPS was continuously sampling from air  
104 at the target RH, thus ensuring that the RH in the closed loop stayed close to that in the  
105 evaporation chamber.  
106

107 **1.3.2 HR-ToF-AMS – Measuring the chemical composition of the particles**

108 Particle chemical composition was measured with an Aerodyne High-resolution Time-of-  
109 flight Aerosol Mass Spectrometer (AMS, Aerodyne). Detailed description of the instrument,  
110 measurement and data processing are presented elsewhere [DeCarlo *et al.*, 2006]. Briefly, AMS  
111 measures the non-refractory composition of sub-micrometer aerosols before and after the  
112 evaporation chamber. The V-mode mass spectra were analyzed using standard TOF-AMS data  
113 analysis toolkits (SQUIRREL 1.56A and PIKA 1.15). A particle collection efficiency factor of 0.5  
114 was applied to account for the loss of particles in the aerodynamic transmission lens and  
115 vaporizer. The relatively ionization efficiency values of 1.1, 1.2, 1.3, 1.4 and 3.7 were used for  
116 nitrate, sulfate, chloride, organic and ammonium, respectively. An elemental analysis was  
117 processed to determine the ratio of oxygen to carbon atoms (O:C) taking into account CHO<sup>+</sup> ion  
118 correction [Aiken *et al.*, 2007; Canagaratna *et al.*, 2015]. The particle mass in the monodisperse  
119 particle population evaporation experiments was too low for AMS experiments. Therefore, a  
120 separate evaporation experiment was performed for particle composition measurements. In  
121 this experiment, the polydisperse particle population was diluted after the O<sub>3</sub> scrubber with 10  
122 lpm of clean air at the desired RH and led directly to the evaporation chamber, i.e. DMA<sub>1</sub> was  
123 bypassed. The clean air was added to reduce the gas phase concentrations of organics and to  
124 set the desired RH.

125

126

### 1.3.3 PTR-ToF-MS – Measuring the gas phase composition

127

A proton-transfer-reaction time-of-flight mass spectrometer (PTR-ToF-MS, PTR-TOF 8000 Ionicon Analytik, Austria) was used to measure the gas-phase compounds during the experiments. The PTR-ToF-MS measured from two points in the setup: after DMA<sub>1</sub>, and after the evaporation chamber. After DMA<sub>1</sub>, the gas-phase was measured in order to verify the DMA's effect of dilution on the gas phase compounds. After the evaporation chamber, the PTR-ToF-MS was used to monitor the gas-phase compounds formed due to evaporation. The PTR-TOF was operated under the following conditions: drift tube voltage and temperature were set to 600 V and 60 °C respectively, drift pressure 2.30 mbar, and E/N was set to 130 Td. The sampling rate of the PTR-TOF was 160 ml min<sup>-1</sup> through heated PEEK (I.D. 1 mm) tubing (temperature 60 °C) to minimize wall losses in the sampling line.

137

138

## 2 Modelling

139

The evaporation was simulated using two models. One of the models simulates the evaporation of a well-mixed liquid-like particle and the other model can simulate the evaporation of semi-solid particles since the particle phase is represented with a layered structure.

143

144

### 2.1 Well-mixed particle evaporation model

145

The "traditional" well-mixed particle evaporation model assumes liquid-like particles for which particle phase molecular transport kinetics do not limit the evaporation, i.e. the particle phase mixing time scale is shorter than the time scale of evaporation. The composition and size evolution of the particles and the evolution gas phase concentrations are obtained by solving the differential equations for the number of organic molecules in a particle and in the gas phase [Vesala *et al.*, 1997; Lehtinen and Kulmala, 2003]

151

$$\frac{dN_{p,i}}{dt} = \frac{2\pi(d_i + d_p)(D_{air,i} + D_{air,p})\beta_i}{k_B T} (p_{\infty,i} - p_{eq,i}) \quad (S1)$$

152

153

$$\frac{dN_{gas,i}}{dt} = -N_{tot} \cdot \frac{dN_{p,i}}{dt} - N_{gas,i} \cdot WLC \quad (S2)$$

154

155

where  $N_{p,i}$  and  $N_{gas,i}$  are the number of molecules  $i$  in a particle and in the gas phase,  $d_i$  and  $d_p$  are the diameters of molecule  $i$  and the particle,  $D_{air,i}$  and  $D_{air,p}$  are the gas phase diffusion coefficients of vapor molecule  $i$  and a particle,  $\beta_i$  is the transition regime correction factor for mass transport for vapor  $i$  and it's calculated based on the version by Lehtinen and Kulmala, [2003],  $k_B$  is the Boltzmann constant,  $T$  is the temperature,  $p_{\infty,i}$  and  $p_{eq,i}$  are the partial vapor pressure of  $i$  in the gas phase and the equilibrium vapor pressure of  $i$  at the particle surface,  $N_{tot}$  is the number concentration of particles and WLC is the vapor wall loss coefficient.

163

The model assumes ideal solution and the equilibrium concentration for compound  $i$  is thus  $p_{eq,i} = X_i \cdot p_{sat,i} \cdot Ke$ , where  $X_i$  is the molar fraction in the particle phase,  $p_{sat,i}$  is the saturation vapor pressure and  $Ke$  is the Kelvin factor of  $i$ . In terms of the saturation concentration ( $C_i^*$ ) the equilibrium concentration can be written as

166

167

$$p_{eq,i} = X_i C_i^* \frac{RT}{M_i} \exp\left(\frac{4\sigma v_i}{RTd_p}\right) \cdot 10^{-9} \quad (S3)$$

where  $R$  is the gas constant,  $M_i$  and  $v_i$  are the molar mass and molar volume of  $i$  and  $\sigma$  is the surface tension of the particle. The exponential term in Eq. (S3) is the Kelvin factor. Eq. (S3) gives  $p_{eq,i}$  in pascals when  $C_i^*$  is given in  $\mu\text{g m}^{-3}$  (thus the factor  $10^{-9}$ ) and other variables in SI units.

The vapor wall loss coefficients (WLC) for the organic vapors in the evaporation chamber are not known. The effect of vapor wall losses was tested by carrying out the evaporation experiments in dry conditions with two different particle number concentrations differing approximately by one order of magnitude. The measured evaporation rates in these two cases did not differ much. Based on model simulations, such a similarity in the evaporation rates despite the difference in particle concentrations suggest that the vapor wall losses were fast with approximately  $\text{WLC} \geq 10^{-2} \text{ s}^{-1}$  (Fig. S2). Therefore, in the model simulations we assumed that all of the evaporated vapors were lost on walls immediately (infinite WLC) unless otherwise stated.

Only organic compounds were included in the model system when simulating the particle evaporation in the dry conditions. For simulating the evaporation in humid conditions water was included in the model system. The amount of water in a particle was calculated assuming constant equilibrium between gas and particle phase and two different methods were used:

Method 1 (basic version of the model): The number of water molecules in a particle was calculated at each time step based on the criteria

$$p_{eq,water} = \frac{\text{RH}}{100\%} \cdot p_{sat,water} \quad (S4)$$

where  $p_{eq,water}$  is the equilibrium vapor pressure of water above the particle surface and  $p_{sat,water}$  is the saturation vapor pressure of pure water. Here the ideal solution assumption was used also for water (unity activity coefficient) and the Kelvin effect was taken into account.

Method 2: Number of water molecules in a particle was calculated based on measured hygroscopic growth factors (HGF) of  $\alpha$ -pinene SOA particles. The hygroscopic growth factor is defined as the ratio between the dry ( $d_{p,dry}$ ) and wet ( $d_{p,wet}$ ) particle diameters ( $\text{HGF} = d_{p,wet}/d_{p,dry}$ ). We assumed that the molecular volumes ( $v$ ) in a mixture equal those of pure compounds in which case the number of water molecules in a particle is

$$N_{p,water} = (\text{HGF}^3 - 1) \frac{\sum_i N_{p,i} v_i}{v_{water}} \quad (S5)$$

where the summation goes over the organic compounds. The HGF was assumed to be size independent, i.e. HGF value stayed the same along the evaporation.

## 2.2 Multi-layer particle evaporation model

The multi-layer particle evaporation model is based on the Kinetic multi-layer model for gas-particle interactions in aerosols and clouds (KM-GAP) [Shiraiwa *et al.*, 2012; Shiraiwa *et al.*, 2013]. In KM-GAP the gas-particle system is divided into multiple layers: gas phase, near-

210 surface gas, sorption layer at the particle surface, particle surface layer and multiple particle  
211 bulk layers. KM-GAP simulates particle evaporation/condensation based on molecular fluxes in  
212 and between gas, particle surface and particle bulk. The model was modified regarding the  
213 treatment of the surface layer. In the modified version a new surface layer (ss layer in Shiraiwa  
214 et al. [2013]) is formed by combining the surface layer with the first particle bulk layer when the  
215 thickness of the surface layer reduces to less than a prescribed value. In our simulations this  
216 value was 0.5 nm. As a result, the number of layers is decreasing along the particle evaporation.  
217 This modification allowed for simulating the evaporation of particles where there is no non-  
218 volatile compound (e.g. seed particle). The particle bulk was initially divided into 30 layers.  
219 Effect of the number of particle bulk layers was tested and for  $\geq 30$  layers the model results  
220 were stable with respect to the change in number of layers.

221 The multi-layer model was applied for dry and 40% RH experiments. For the 40% RH  
222 experiment water was included in the model by assuming ideal solution and constant  
223 instantaneous equilibration between gas phase and particle surface for water. Transport of  
224 water molecules between surface and particle bulk phase and within particle bulk was  
225 calculated similarly as for the organic compounds. Organics were treated as an ideal solution  
226 (i.e. activity coefficients were unity), desorption lifetimes of all organic compounds were  
227 assumed to be  $10^{-6}$  s and other properties were the same as in the well-mixed particle  
228 evaporation model.

229

### 230 2.3 Fitting of VBS using the genetic algorithm

231

232 The well-mixed particle evaporation model calculates the particle diameter as a function  
233 of time based on the initial particle phase mass fractions and the properties of each compound  
234 provided as inputs. We presented the multi-component SOA particles using an 8-bin volatility  
235 basis set (VBS). In order to find a satisfactory set of eight initial mass fractions that produce an  
236 evaporation similar to the observations, the parameter space was explored heuristically using  
237 the genetic algorithm (GA) [Goldberg, 1989], which mimics natural selection.

238

Ultimately, the goal of the GA in this work is to minimize the fitness function

239

$$240 F(y_i; y_{m,i}) = \sum_{i=1}^n [y_i(t_i) - y_{m,i}(t_i)]^2 \quad (S6)$$

241

242 where  $y_i$  and  $y_{m,i}$  are the measured and modelled particle size normalized by the initial size  
243  $d_p/d_{p,o}$  at time  $t_i$ , respectively. The summation in equation (S6) is over the measured data points.  
244 The working principle of the GA in this study can be broken down into 5 steps:

245

- 246 1) Create the first generation of initial mass fractions.
- 247 2) Perform evaporation simulation for each member of the generation.
- 248 3) Calculate the fitness of each member in the first generation.
- 249 4) Create the next generation.
  - 250 a. Select two parents.
  - 251 b. Create a child from the parents.
  - 252 c. Perform mutation to the child.
  - 253 d. Perform evaporation simulation to the child.
  - 254 e. Calculate the fitness of the child.
  - 255 f. If the fitness of the child is better than the worst individual in the previous  
generation accept the child to the new generation. Otherwise accept one of the  
parents.

- 256 g. Go to (a) if the size of the new generation is smaller than the previous  
 257 generation.  
 258 5) Repeat step 4 until the absolute difference between the fitnesses of the best members  
 259 of the current and previous generation is smaller than  $\epsilon = 10^{-5}$  or until a predetermined  
 260 amount of generations has been created.

261 In our simulations, each member of a generation consists of eight mass fractions which  
 262 represent the relative amount of the eight  $C^*$  bins ( $10^{-3}$ - $10^4 \mu\text{g m}^{-3}$ ) in a particle at the beginning  
 263 of the evaporation. In the first generation the mass fractions of each member are created  
 264 randomly. For the creation of pseudorandom numbers, we used the Mersenne twister  
 265 algorithm.

266 The most complicated parts of the GA are steps 4a and 4b. Choosing parents from an  
 267 entire population is not a straightforward task. If only the best members are constantly chosen  
 268 as parents the parameter space might not be explored thoroughly. If the members are chosen  
 269 to be parents with equal probability the algorithm might not converge to a minimum of the  
 270 fitness function. In this study, we used the exponential function to calculate the probability of  
 271 each member to be chosen as a parent  
 272

$$273 \quad P(\text{parent}) \propto \exp\left(\frac{F_m}{T}\right) \quad (S7)$$

274 where  $F_m$  is the value of the fitness function (S6) of that particular member and  $T$  is determined  
 275 as the difference between the worst and best fitness of the members of the previous  
 276 generation. This way when  $T$  is large, members with larger values of the fitness function have  
 277 higher probability to be chosen as parents compared with the situation where  $T$  is small.  
 278 Equation (S7) also ensures that the better members are chosen as parents more often than the  
 279 worse members.  
 280

281 After the parents are selected the mass fractions of the child are calculated from the  
 282 parents' mass fractions as  
 283

$$284 \quad X_{mass,i,child} = X_{mass,i,l} + \frac{F_l}{F_h} (X_{mass,i,l} - X_{mass,i,h}) \quad (S8)$$

285 where  $X_{mass,i}$  is the mass fraction of VBS bin  $i$  and subscripts  $l$  and  $h$  refer to the parents which  
 286 have lower and higher value of the fitness function, respectively. Using equation (S8) means  
 287 that one compares the parents' mass fractions and assumes that, if parent 1 has smaller value  
 288 of the fitness function than parent 2 it is due to the fact that the mass fractions differ between  
 289 the parents by some amounts  $\Delta X_{mass,1} \dots \Delta X_{mass,8}$ . The algorithm then tries to change each mass  
 290 fraction of the child in the same direction where the difference between the parents points. In  
 291 order to not take too large steps in one generation this change is scaled by the factor  
 292 proportional to the values of the fitness functions of the parents.  
 293

294 The use of equation (S8) ensures that the sum of child's mass fractions equal unity but  
 295 allows negative mass fractions to occur. That is why every child is checked for negative values  
 296 of the mass fractions and, in the event of finding those, the mass fraction with the negative  
 297 value is changed to zero and an amount equal to the negative value is removed from the next,  
 298 less volatile bin(s).

299 Finally, a mutation is performed on the child by randomly changing two mass fractions  
 300 with each other with probability  $p_{mutation} = 5\%$ . The child is accepted to the new generation if the

301 value of the fitness function is lower than the worst value in the previous generation. If the  
302 fitness function has higher value, one of the parents is selected to the next generation with  
303 equal probability.

304 In addition, in step 4 the child is not accepted to the new generation if the volatility  
305 distribution suggests unreasonably high oxidized organic concentration compared to the  
306 reacted  $\alpha$ -pinene (200 ppb). The limit is set as

$$307 \sum_i (X_i C_i^*) < C_{reacted} \quad (S9)$$

309 where  $X_i$  is the dry particle molar fraction of compound  $i$  and  $C_{reacted}$  is the mass concentration of  
310 the reacted  $\alpha$ -pinene. The left hand side of eq. (S9) describes the gas phase concentration of  
311 the condensing organics at the end of the flow tube assuming that gas-particle equilibrium is  
312 reached. In the cases where the oxidized organic mass concentration suggested by the volatility  
313 distribution is higher than the allowed, new parents are chosen and a new child calculated until  
314 this mass balance criterion is met. The mass balance criterion is approximate as it doesn't take  
315 into account the increase in organic mass with oxidation (addition of O), vapor wall losses or  
316 particle phase organic mass (< 10% of reacted  $\alpha$ -pinene mass). These factors are expected to  
317 cause negligible effect on the results as applying the mass balance criterion described in eq.  
318 (S9) caused only a minor effect on the results compared to applying no such mass balance limit.

319 We performed 20 set of genetic algorithm simulations, each with 15 generations and 200  
320 members per generation, for the dry, 40% and 80% RH experiment. The model simulation with  
321 the smallest fitness value from each simulation set was selected giving 20 different initial  
322 compositions. The best fit initial composition was chosen from these 20 cases as the one with  
323 the smallest fitness function value. Out of the 20 cases we considered only those with fitness <  
324 0.002 (16 for dry, 20 for 40% RH, 20 for 80% RH) when reporting the variability in the initial  
325 composition (Fig. 1 A, 2 A-B).

#### 327 **2.4 Effect of theoretical treatment of water uptake**

328 The basic version of the well-mixed particle evaporation model calculated water content  
329 of a particle assuming an ideal solution. The initial particle composition optimized for 80% RH  
330 with this basic version is shown in Fig. 1 B. When modelling the evaporation at 40% RH we  
331 tested how the theoretical treatment of particle water uptake affected the model predictions.  
332 This was done by using the experimentally determined hygroscopic growth factors (HGF) of  $\alpha$ -  
333 pinene SOA to calculate water uptake. The best fit initial VBS determined at 80% RH using HGF  
334 = 0.05 [Pajunoja *et al.*, 2015; Varutbangul *et al.*, 2006] and the corresponding size evolution are  
335 shown in Fig. S3 A-B. This initial VBS was used for simulating the evaporation with the well-  
336 mixed particle evaporation model at 40% RH using HGF = 0.01 [Varutbangul *et al.*, 2006].  
337 Results for RH40% are shown in Fig. 2B and also in Fig. S3 (blue dashed line). The best fit initial  
338 VBS and the variability within the genetic algorithm simulations in the HGF simulations at 80%  
339 RH show a similar general pattern as compared to the ideal solution simulations. Also with HGF  
340 representation of water uptake, 20 genetic algorithm simulation sets were performed (all 20  
341 resulting initial compositions had fitness < 0.002).

342  
343  
344  
345  
346



347  
348

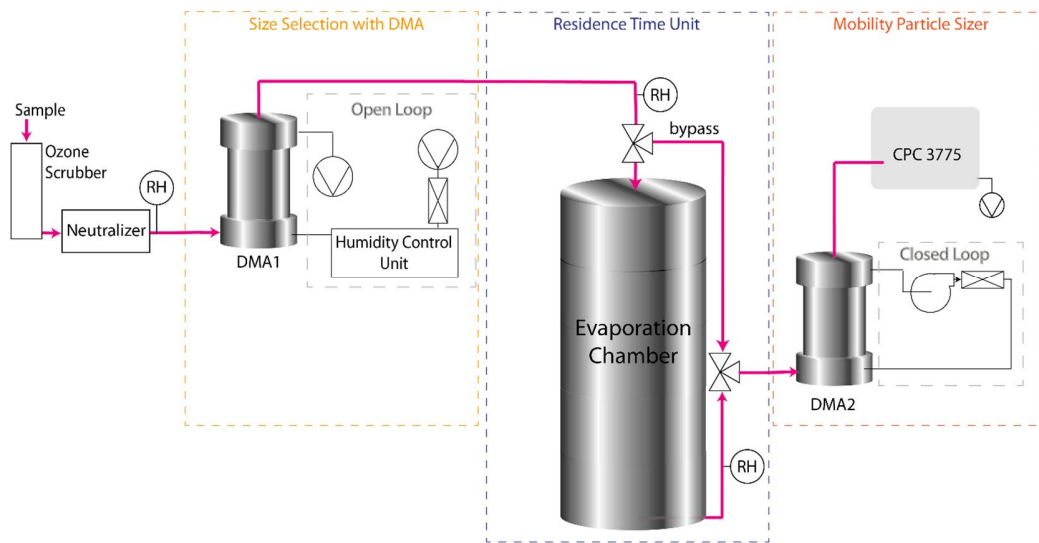

349 **Figure S1.** Schematics of particle size measurement system. Pink line represents sample line  
350 from polydisperse sample to the evaporated monodisperse sample. The SMPS system on the  
351 right hand side was TSI model 3080 and both high and low flow modes were used depending on  
352 the target residence time. The humidity control unit in the DMA sheat line was optional and  
353 only in use in 40% and 80% RH experiments.  
354  
355

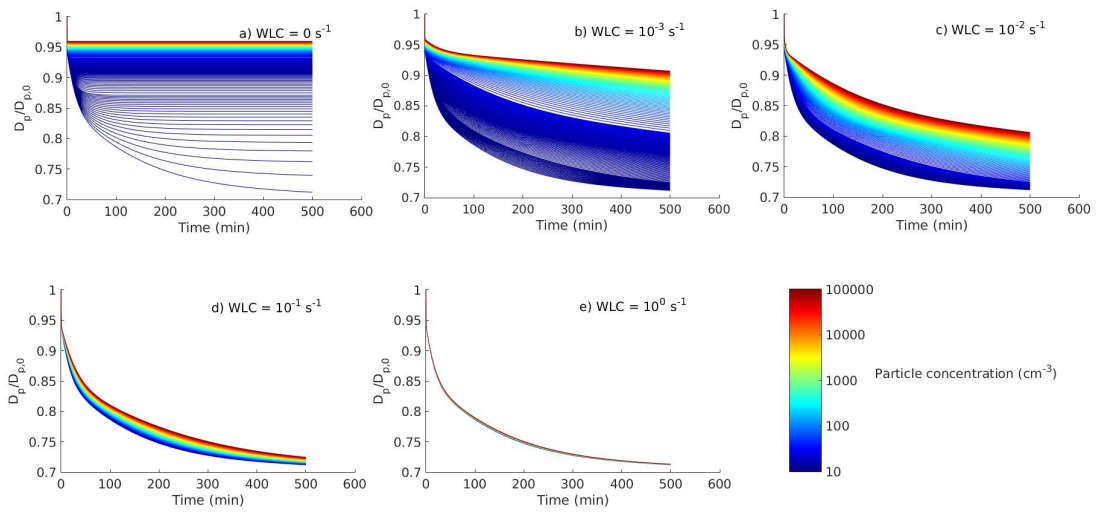

356

357 **Figure S2.** Time evolution of particle diameter normalized with the initial diameter (80 nm) at  
 358 dry conditions. Circles: measured size evolution. Lines: Size evolution simulated with the well-  
 359 mixed particle evaporation model with different assumptions of the vapor wall loss coefficient  
 360 (WLC) and for different particle concentrations (indicated with the line color). The initial particle  
 361 composition was the same in all simulations.

362

363

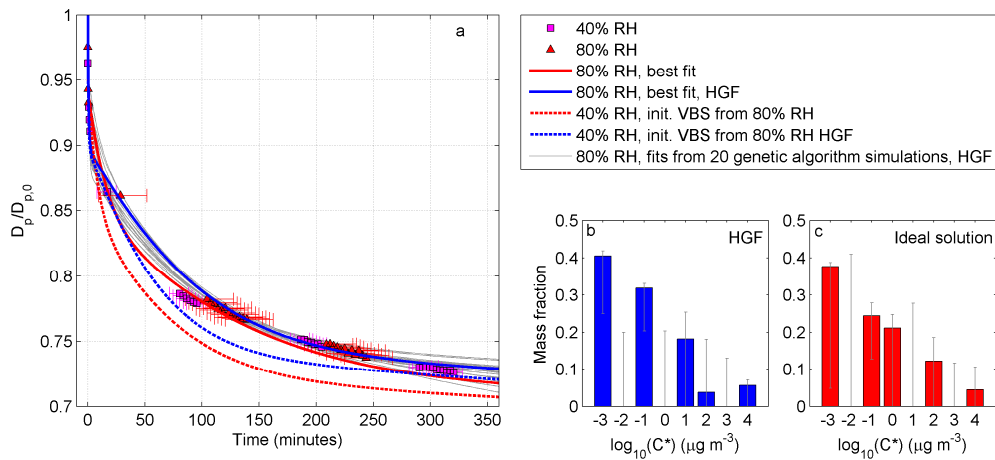

364

365 **Figure S3.** Measured evaporation of particles with initial size 80 nm and model simulations at  
 366 40% and 80% RH with different treatment of particle water uptake. Time evolution of particle  
 367 diameter normalized with the initial diameter (a). Squares and triangles show measured  
 368 evaporation at 40% and 80% RH, respectively. The error bars in time originate from the  
 369 chamber filling time. Well-mixed particle model simulations at 40% and 80% RH with water  
 370 uptake calculated based on ideal solution assumption: Simulation with the best fit initial  
 371 volatility distribution at 80% RH (red solid line) and simulation with the corresponding initial  
 372 composition (shown in c) at 40% RH (red dashed line). Well-mixed particle model simulations at  
 373 40% and 80% RH with water uptake calculated based on HGF: Simulation with the best fit initial  
 374 volatility distribution at 80% RH (blue solid line) and simulation with the corresponding initial  
 375 composition (shown in b) at 40% RH (blue dashed line). Error bars in b-c show the variability in  
 376 the initial volatility distributions (minimum and maximum) within the best fits from 20 genetic  
 377 algorithm simulations. The corresponding size evolutions for HGF case at 80% RH are shown in  
 378 a (gray lines). The corresponding size evolutions for ideal solution case are shown in Fig. 1 a.  
 379  
 380

381

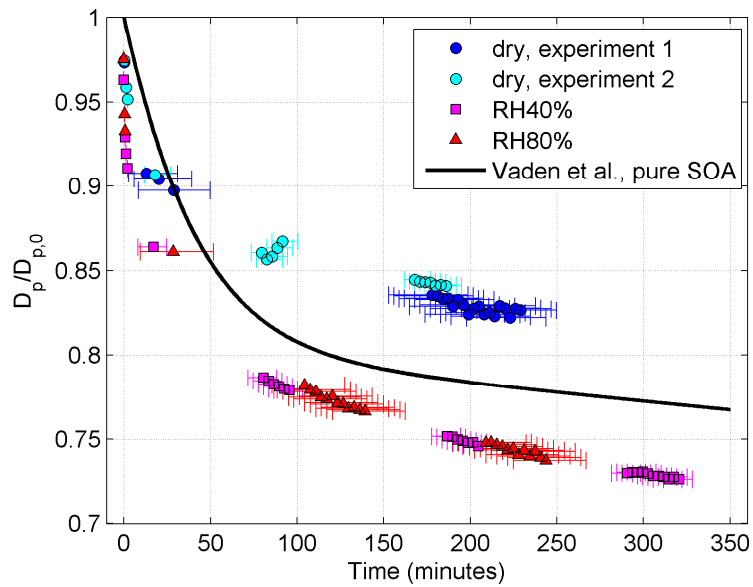

382 **Figure S4.** Time evolution of particle diameter normalized with the initial diameter (80 nm)  
383 measured in this study under dry (circles), 40% RH (squares) and 80% RH (triangles) conditions.  
384 The error bars in time originate from the chamber filling time. Black line shows the  
385 biexponential fit by Vaden et al. [2011] on their measured evaporation of particles (initially 125-  
386 251 in diameter) under dry conditions.

387

388

389 **Movie S1.** Modelled evolution of particle size and composition at 80% RH. Time evolution of  
390 particle diameter normalized with the initial diameter: triangles show measured evaporation  
391 with error bars in time originating from the chamber filling time and line shows the well-mixed  
392 particle evaporation model simulation with the best fit initial particle composition. The  
393 corresponding particle composition development is shown in the inset.  
394  
395
